# Supplementary material for: BRD4 Inhibition Enhances the Antitumor Effects of Radiation Therapy in a Murine Breast Cancer Model
Source: Preprints.org preprint supplement (doi:10.20944/preprints202307.1702.v1), 2023-07-26
Supplement: Supplementary file 1 [file supplementary]

| **Reagent** | **Clone** | **Source** | **Identifier** |
| --- | --- | --- | --- |
| FITC Rat Anti-Mouse CD3 | 17A2 | Biolegend | #100204 |
| FITC Rat Anti-Mouse/Human CD11b | M1/70 | Biolegend | #101206 |
| FITC Rat Anti-Mouse CD25 | PC61 | Biolegend | #102005 |
| FITC Rat Anti-Mouse CD45 | 30-F11 | BD Biosciences | #553080 |
| PE Rat Anti-Mouse CD8a | 53-6.7 | Biolegend | #100708 |
| PE Rat Anti-Mouse Foxp3 | NRRF-30 | Invitrogen | #12-4771-82 |
| PE Rat Anti-Mouse F4/80 | T45-2342 | BD Biosciences | #565410 |
| PE Rat Anti-Mouse Ly6G | 1A8 | Biolegend | #127607 |
| APC Rat Anti-Mouse CD4 | RM4-5 | Biolegend | #100516 |
| APC Rat Anti-Mouse/Human CD11b | M1/70 | Biolegend | #101212 |
| APC Rat Anti-Mouse CD206 | C068C2 | Biolegend | #141708 |
| PerCP-Cy5.5 Rat Anti-Mouse CD3 | 17A2 | Biolegend | #100218 |
| PerCP-Cy5.5 Rat Anti-Mouse Ly6C | HK1.4 | Biolegend | #128011 |
| PerCP-Cy5.5 Mouse Anti-Human/Mouse Granzyme B | QA16A02 | Biolegend | #372211 |

**Table S1. List of flow cytometric antibodies used in the study.**
